# Supplementary material for: Targeting of Protein Kinase CK2 Elicits Antiviral Activity on Bovine Coronavirus Infection
Source: Viruses. 2022 Mar 7;14(3):552. doi: 10.3390/v14030552 (PMC8949182; doi:10.3390/v14030552)
Supplement: Supplementary file 1 [file viruses-14-00552-s001.zip]

Archive with 7 entries (7 files):
- FigS1.png
- FigS2.png
- FigS3.png
- FigS4.png
- FigS5.png
- FigS6.png
- Viruses 2022. Supplementary Material.pdf
